# Supplementary material
Source: PubMed Central journal article supplement (PMC5923134)
Supplement: AAC.02497-17_zac005187135s1.pdf [file AAC.02497-17_zac005187135s1.pdf]

**Supplemental Table 1. Characteristics of *K. pneumoniae* isolates from the present study**

| Pt | Strain | C-A MIC (µg/mL) | Mero MIC (µg/mL) | ST  | wzi | clade | OmpK35   | OmpK36           | KPC                       | <i>bla</i> <sub>KPC</sub>   | Other resistance genes                                                                                                                                                                   | Plasmid InC                                                             |
|----|--------|-----------------|------------------|-----|-----|-------|----------|------------------|---------------------------|-----------------------------|------------------------------------------------------------------------------------------------------------------------------------------------------------------------------------------|-------------------------------------------------------------------------|
| 1  | 1421   | 2               | 128              | 258 | 154 | cps-2 | AA89stop | IS5 promoter ins | KPC-3                     | <i>bla</i> <sub>KPC-3</sub> | <i>bla</i> <sub>TEM-1</sub> , <i>bla</i> <sub>SHV-11</sub> , <i>bla</i> <sub>OXA-9</sub> , <i>aadA1</i> , <i>aac(6')-Ib</i> , <i>strAB</i> , <i>sul2</i> , <i>dfrA14</i>                 | ColpVC, Col(MG828), pBK30683 repA, repB, pNJST258N3                     |
| 1  | 1445   | 32              | 0.25             | 258 | 154 | cps-2 | AA89stop | WT               | AA179D->Y, 243T->M        | 532G->T, 725C->T            | <i>bla</i> <sub>TEM-1</sub> , <i>bla</i> <sub>SHV-11</sub> , <i>bla</i> <sub>OXA-9</sub> , <i>aadA1</i> , <i>aac(6')-Ib</i> , <i>strAB</i> , <i>sul2</i> , <i>dfrA14</i>                 | ColpVC, Col(MG828), pBK30683 repA, repB, pNJST258N3, L/M                |
| 1  | 1446   | 256             | 0.5              | 258 | 154 | cps-2 | AA89stop | WT               | AA179D->Y, 243T->M        | 532G->T, 725C->T            | <i>bla</i> <sub>TEM-1</sub> , <i>bla</i> <sub>SHV-11</sub> , <i>bla</i> <sub>OXA-9</sub> , <i>aadA1</i> , <i>aac(6')-Ib</i> , <i>strAB</i> , <i>sul2</i> , <i>dfrA14</i>                 | ColpVC, Col(MG828), pBK30683 repA, repB, pNJST258N3, L/M                |
| 2  | 1438   | 4               | 32               | 258 | 154 | cps-2 | AA89stop | WT               | KPC-3                     | <i>bla</i> <sub>KPC-3</sub> | <i>bla</i> <sub>TEM-1</sub> , <i>bla</i> <sub>SHV-11</sub> , <i>bla</i> <sub>OXA-9</sub> , <i>aadA1</i> , <i>aac(6')-Ib</i> , <i>strAB</i> , <i>sul2</i> , <i>dfrA14</i>                 | pBK30683 repB, pNJST258N3                                               |
| 2  | 1491   | 32              | 8                | 258 | 154 | cps-2 | AA89stop | WT               | AA240V->G (KPC-8)         | 716T->G                     | <i>bla</i> <sub>TEM-1</sub> , <i>bla</i> <sub>SHV-11</sub> , <i>bla</i> <sub>OXA-9</sub> , <i>aadA1</i> , <i>aac(6')-Ib</i> , <i>strAB</i> , <i>sul2</i> , <i>dfrA14</i>                 | pBK30683 repB, pNJST258N3                                               |
| 2  | 1492   | >256            | 4                | 258 | 154 | cps-2 | AA89stop | IS5 ins 827bp    | AA179D->Y                 | 532G->T                     | <i>bla</i> <sub>TEM-1</sub> , <i>bla</i> <sub>SHV-11</sub> , <i>bla</i> <sub>OXA-9</sub> , <i>aadA1</i> , <i>aac(6')-Ib</i> , <i>strAB</i> , <i>sul2</i> , <i>dfrA14</i>                 | pBK30683 repB, pNJST258N3                                               |
| 3  | 1439   | 2               | 32               | 258 | 154 | cps-2 | AA89stop | WT               | KPC-3                     | <i>bla</i> <sub>KPC-3</sub> | <i>bla</i> <sub>TEM-1</sub> , <i>bla</i> <sub>SHV-11</sub> , <i>bla</i> <sub>OXA-9</sub> , <i>aadA1</i> , <i>aac(6')-Ib</i> , <i>strAB</i> , <i>sul2</i> , <i>dfrA14</i>                 | pBK30683 repB, pNJST258N3                                               |
| 3  | 1520   | 128             | 0.25             | 258 | 154 | cps-2 | AA89stop | WT               | AA179D->Y                 | 532G->T                     | <i>bla</i> <sub>TEM-1</sub> , <i>bla</i> <sub>SHV-11</sub> , <i>bla</i> <sub>OXA-9</sub> , <i>aadA1</i> , <i>aac(6')-Ib</i> , <i>strAB</i> , <i>sul2</i> , <i>dfrA14</i>                 | pBK30683 repB, pNJST258N3                                               |
| 3  | 1521   | 64              | 0.25             | 258 | 154 | cps-2 | AA89stop | WT               | AA179D->Y                 | 532G->T                     | <i>bla</i> <sub>TEM-1</sub> , <i>bla</i> <sub>SHV-11</sub> , <i>bla</i> <sub>OXA-9</sub> , <i>aadA1</i> , <i>aac(6')-Ib</i> , <i>strAB</i> , <i>sul2</i> , <i>dfrA14</i>                 | pBK30683 repB, pNJST258N3                                               |
| 4  | 1548   | 1               | 16               | 258 | 154 | cps-2 | AA89stop | WT               | KPC-3                     | <i>bla</i> <sub>KPC-3</sub> | <i>bla</i> <sub>TEM-1</sub> , <i>bla</i> <sub>SHV-11</sub> , <i>bla</i> <sub>OXA-9</sub> , <i>aadA1</i> , <i>aac(6')-Ib</i> , <i>strAB</i> , <i>sul2</i> , <i>dfrA14</i> , <i>tet(A)</i> | pBK30683 repB, pNJST258N3, FIB, FIC, Col                                |
| 4  | 1571   | 256             | 0.25             | 258 | 154 | cps-2 | AA89stop | WT               | AA177A->E, 179D->Y        | 527C->A, 532G->T            | <i>bla</i> <sub>TEM-1</sub> , <i>bla</i> <sub>SHV-11</sub> , <i>bla</i> <sub>OXA-9</sub> , <i>aadA1</i> , <i>aac(6')-Ib</i> , <i>strAB</i> , <i>sul2</i> , <i>dfrA14</i> , <i>tet(A)</i> | pBK30683 repB, pNJST258N3, FIB, FIC, Col                                |
| 4  | 1572   | 128             | 0.25             | 258 | 154 | cps-2 | AA89stop | WT               | AA7L->P, 177A->E, 179D->Y | 29T->C, 527C->A, 532G->T    | <i>bla</i> <sub>TEM-1</sub> , <i>bla</i> <sub>SHV-11</sub> , <i>bla</i> <sub>OXA-9</sub> , <i>aadA1</i> , <i>aac(6')-Ib</i> , <i>strAB</i> , <i>sul2</i> , <i>dfrA14</i> , <i>tet(A)</i> | pBK30683 repB, pNJST258N3, FIB, FIC, Col                                |
| 5  | 1519   | 2               | 32               | 258 | 154 | cps-2 | AA89stop | WT               | KPC-3                     | <i>bla</i> <sub>KPC-3</sub> | <i>bla</i> <sub>TEM-1</sub> , <i>bla</i> <sub>SHV-11</sub> , <i>bla</i> <sub>OXA-9</sub> , <i>aac(6')-Ib</i>                                                                             | pBK30683 repB, pNJST258N3                                               |
| 5  | 1582   | 64              | ≤0.06            | 258 | 154 | cps-2 | AA89stop | WT               | AA179D->Y                 | 532G->T                     | <i>bla</i> <sub>TEM-1</sub> , <i>bla</i> <sub>SHV-11</sub> , <i>bla</i> <sub>OXA-9</sub> , <i>aac(6')-Ib</i>                                                                             | pBK30683 repB, pNJST258N3                                               |
| 6  | 1684   | 0.5             | 8                | 258 | 154 | cps-2 | AA89stop | WT               | KPC-3                     | <i>bla</i> <sub>KPC-3</sub> | <i>bla</i> <sub>TEM-1</sub> , <i>bla</i> <sub>SHV-12</sub> , <i>bla</i> <sub>OXA-9</sub> , <i>aadA2</i> , <i>aac(6')-Ib</i>                                                              | colRNAI, ColpVC, IncFia (HI1), IncFIB(K)-Kpn3, IncFII, IncX3, PBK30683A |

|   |      |    |       |     |     |       |          |                     |                 |                             |                                                                                                                                |                                                                                  |
|---|------|----|-------|-----|-----|-------|----------|---------------------|-----------------|-----------------------------|--------------------------------------------------------------------------------------------------------------------------------|----------------------------------------------------------------------------------|
| 6 | 1686 | 64 | ≤0.06 | 258 | 154 | cps-2 | AA89stop | WT                  | AA179D->Y       | 532G->T                     | <i>bla</i> <sub>TEM-1</sub> , <i>bla</i> <sub>SHV-12</sub> , <i>bla</i> <sub>OXA-9</sub> , <i>aadA2</i> ,<br><i>aac(6')-Ib</i> | colR <sub>NAI</sub> , IncFia (HI1), IncFIB(K)-<br>Kpn3, IncFII, IncX3, PBK30683A |
| 7 | 1587 | 2  | 16    | 258 | 154 | cps-2 | AA89stop | WT                  | KPC-3           | <i>bla</i> <sub>KPC-3</sub> | <i>bla</i> <sub>TEM-1B</sub> , <i>bla</i> <sub>SHV-11</sub> , <i>bla</i> <sub>OXA-9</sub> ,<br><i>aac(6')-Ib</i>               | IncFIB(AP001918), pBK30683B,<br>pNJST258N3                                       |
| 7 | 1688 | 32 | ≤0.06 | 258 | 154 | cps-2 | AA89stop | WT                  | AA166-167EL ins | 507->GAGCTGins              | <i>bla</i> <sub>TEM-1</sub> , <i>bla</i> <sub>SHV-11</sub> , <i>bla</i> <sub>OXA-9</sub>                                       | IncFIB(AP001918), pBK30683B,<br>pNJST258N3                                       |
| 8 | 1694 | 2  | 16    | 258 | 154 | cps-2 | AA89stop | WT                  | KPC-3           | <i>bla</i> <sub>KPC-3</sub> | <i>bla</i> <sub>TEM-1</sub> , <i>bla</i> <sub>SHV-11</sub> , <i>bla</i> <sub>OXA-9</sub>                                       | pBK30683B, pNJST258N3                                                            |
| 8 | 1765 | 32 | 4     | 258 | 154 | cps-2 | AA89stop | IS5 promoter<br>ins | AA179D->Y       | 532G->T                     | <i>bla</i> <sub>TEM-1</sub> , <i>bla</i> <sub>SHV-11</sub> , <i>bla</i> <sub>OXA-9</sub>                                       | pBK30683B, pNJST258N3                                                            |

InC = Incompatibility group; KPC = *Klebsiella pneumoniae* carbapenemase; Mero = Meropenem; MIC = Minimum inhibitory concentration; ST = Sequence type; WT = Wild-type
